# Supplementary material for: Are the Follicular Fluid Characteristics of Recovered Coronavirus Disease 2019 Patients Different From Those of Vaccinated Women Approaching in vitro Fertilization?
Source: Frontiers journal article supplement (doi:10.3389/fphys.2022.840109), 2022-02-22

## *Supplementary Material*

### **Are the follicular fluid characteristics of recovered COVID-19 patients different from those of vaccinated women approaching in vitro fertilization?**

Maria A. Castiglione Morelli,<sup>1</sup> Assunta Iuliano,<sup>2</sup> Sergio C. A. Schettini,<sup>2</sup> Angela Ferri,<sup>2</sup> Paola Colucci,<sup>2</sup> Licia Viggiani,<sup>1</sup> Ilenia Matera,<sup>1</sup> Angela Ostuni<sup>1\*</sup>

<sup>1</sup> Department of Sciences, University of Basilicata, Potenza, Italy

<sup>2</sup> Center for Reproductive Medicine of “San Carlo” Hospital, Potenza, Italy

**\* Correspondence:**

Angela Ostuni, Department of Sciences, University of Basilicata, viale Ateneo Lucano 10, 85100, Potenza, Italy (tel: 0039-0971-205453, email: [angela.ostuni@unibas.it](mailto:angela.ostuni@unibas.it))

**Supplementary Table 1 - Symptoms presented by SARS-CoV-2 positive patients before undergoing IVF treatments.**

| <b>Symptoms</b>        | <b>SARS-CoV-2 patients (N =5)</b> |
|------------------------|-----------------------------------|
| <i>Fever</i>           | 3                                 |
| <i>Arthralgia</i>      | 2                                 |
| <i>Aphonia</i>         | 1                                 |
| <i>Weakness</i>        | 2                                 |
| <i>Odour-blindness</i> | 2                                 |

**Supplementary Figure 1.** PLS-DA score plot obtained from the  $^1\text{H}$ -NMR FF spectral data of the 20 women examined. The  $R^2\text{X}$ ,  $R^2\text{Y}$  and  $Q^2$  values for this two-component model were 0.48, 0.69 and 0.56, respectively. Data were coloured by group: healthy control (N=9, black dots), vaccinated (N=6, blue triangles) and recovered COVID-19 (N=5, red triangles).

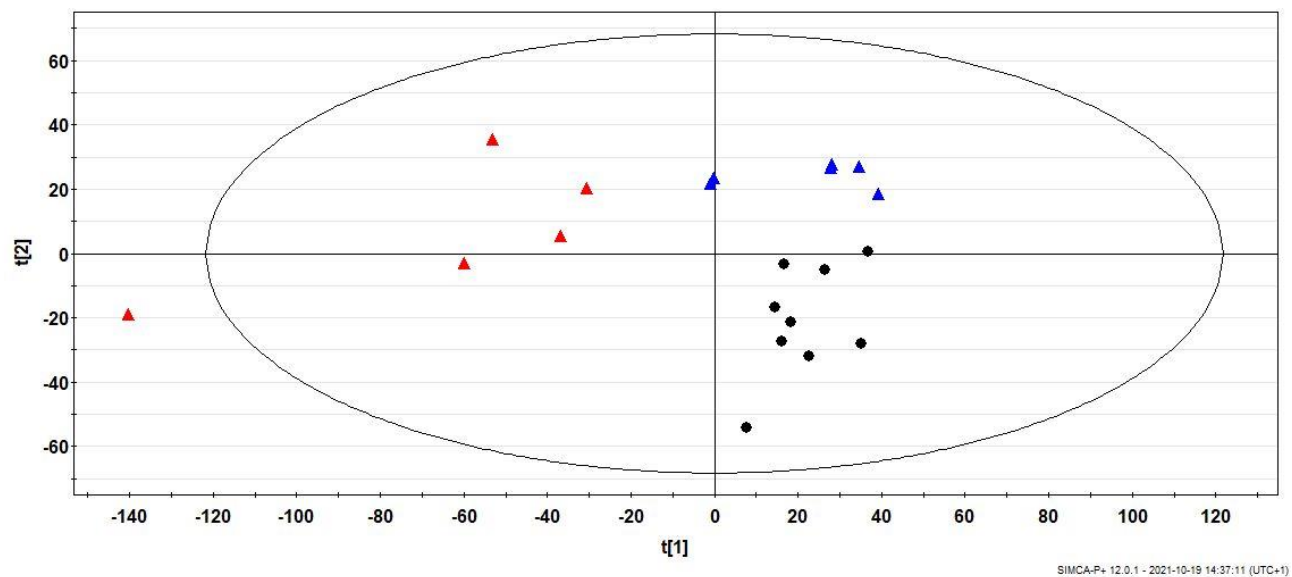

# Supplementary Material

## Effects of COVID19 and vaccination on follicular fluid

**Supplementary Table 2.** Metabolites identified by NMR which were useful to discriminate between follicular fluids of healthy control and women vaccinated against SARS-CoV-2 or recovered COVID-19 patients.

| Metabolite  | NMR (δ) | Healthy (n=9) | Vaccinated (n=6) | VIP | p-value   | Recovered (n=5) | VIP | p-value |
|-------------|---------|---------------|------------------|-----|-----------|-----------------|-----|---------|
| Ala         | 1.48    | 106.0 ± 17.4  | 130.8 ± 21.5     | 1.4 | 0.03      | 55.7 ± 25.9     | 1.4 | 0.0009  |
| Asn         | 2.88    | 235.3 ± 266.2 | 63.7 ± 76.9      | 3.5 | ns        | 256.7 ± 181.5   | *   | ns      |
| Asp         | 3.80    | 296.4 ± 95.2  | 216.7 ± 76.3     | 2.4 | ns        | 262.2 ± 95.1    | *   | ns      |
| Asp         | 2.84    | 63.3 ± 59.7   | 30.9 ± 27.9      | 1.3 | ns        | 132.5 ± 135.9   | 1.1 | ns      |
| Asp         | 2.76    | 66.8 ± 74.5   | 37.8 ± 24.4      | 1.5 | ns        | 74.4 ± 76.5     | *   | ns      |
| Cholesterol | 0.88    | 119.5 ± 35.9  | 95.0 ± 30.1      | 1.1 | ns        | 71.1 ± 44.2     | 1.2 | 0.04    |
| Choline     | 3.16    | 235.9 ± 225.4 | 73.1 ± 61.6      | 3.5 | ns        | 213.7 ± 155.9   | *   | ns      |
| Choline     | 4.08    | 75.8 ± 71.5   | 30.6 ± 7.9       | 1.7 | ns        | 16.3 ± 11.6     | 1.3 | ns      |
| Choline     | 3.52    | 209.5 ± 53.5  | 196.7 ± 62.3     | *   | ns        | 103.9 ± 41.7    | 2.0 | 0.003   |
| Creatine    | 3.92    | 237.5 ± 64.1  | 258.0 ± 68.1     | *   | ns        | 168.7 ± 61.9    | 1.4 | ns      |
| α-Glucose   | 3.84    | 215.9 ± 61.8  | 273.8 ± 76.3     | 1.9 | ns        | 168.1 ± 71.9    | 1.1 | ns      |
| α-Glucose   | 5.24    | 102.7 ± 43.8  | 140.8 ± 38.1     | 1.6 | ns        | 129.7 ± 34.7    | *   | ns      |
| β-Glucose   | 3.40    | 142.2 ± 44.5  | 173.2 ± 47.1     | 1.2 | ns        | 84.8 ± 35.9     | 1.6 | 0.006   |
| α-Glucose   | 3.48    | 268.4 ± 83.8  | 306.2 ± 96.4     | 1.1 | ns        | 149.6 ± 54.2    | 1.9 | 0.01    |
| α-Glucose   | 3.72    | 285.1 ± 57.5  | 305.3 ± 81.9     | 1.0 | ns        | 180.4 ± 87.2    | 1.8 | 0.02    |
| α-Glucose   | 3.24    | 364.3 ± 68.9  | 367.1 ± 85.1     | *   | ns        | 165.7 ± 64.1    | 2.9 | 0.0002  |
| β -Glucose  | 3.44    | 280.3 ± 75.1  | 269.8 ± 75.6     | *   | ns        | 124.4 ± 48.7    | 2.5 | 0.001   |
| β -Glucose  | 3.88    | 176.3 ± 34.2  | 180.7 ± 39.8     | *   | ns        | 108.9 ± 44.6    | 1.5 | 0.008   |
| Gln         | 2.12    | 96.2 ± 24.7   | 100.2 ± 14.4     | *   | ns        | 44.9 ± 15.4     | 1.4 | 0.001   |
| Gln         | 2.44    | 76.8 ± 16.7   | 80.1 ± 14.0      | *   | ns        | 38.7 ± 12.7     | 1.3 | 0.0008  |
| Glu         | 2.08    | 131.1 ± 41.5  | 101.6 ± 10.9     | 1.5 | ns        | 58.0 ± 19.3     | 1.7 | 0.003   |
| Glycerol    | 3.56    | 204.2 ± 50.1  | 216.7 ± 45.4     | *   | ns        | 99.0 ± 36.9     | 2.0 | 0.001   |
| Glycerol    | 3.64    | 71.5 ± 14.5   | 63.8 ± 10.8      | *   | ns        | 29.4 ± 18.2     | 1.3 | 0.001   |
| GPC         | 3.68    | 124.4 ± 37.5  | 105.9 ± 18.9     | *   | ns        | 50.1 ± 34.4     | 1.7 | 0.01    |
| β-HB        | 2.40    | 90.4 ± 16.8   | 79.5 ± 15.2      | *   | ns        | 45.2 ± 16.2     | 1.4 | 0.0004  |
| Lactate     | 1.32    | 398.9 ± 208.4 | 539.3 ± 186.5    | 2.7 | ns        | 465.6 ± 220.9   | *   | ns      |
| Lipid       | 1.28    | 171.7 ± 137.7 | 70.1 ± 26.6      | 2.6 | ns        | 57.2 ± 36.4     | 1.9 | ns      |
| Lipid       | 5.28    | 72.4 ± 33.3   | 29.9 ± 5.7       | 2.0 | 0.009     | 86.9 ± 49.9     | *   | ns      |
| Phe         | 3.12    | 95.3 ± 104.4  | 51.8 ± 36.7      | 1.6 | ns        | 100.7 ± 92.6    | *   | ns      |
| Phe         | 3.28    | 217.3 ± 78.2  | 183.3 ± 51.9     | 1.3 | ns        | 93.8 ± 26.1     | 2.1 | 0.006   |
| PC          | 3.20    | 139.3 ± 66.5  | 129.7 ± 13.5     | *   | ns        | 59.1 ± 23.3     | 1.6 | 0.02    |
| Pro         | 2.04    | 157.6 ± 33.3  | 177.9 ± 21.1     | 1.2 | ns        | 90.3 ± 47.2     | 1.5 | 0.009   |
| Pro         | 3.36    | 72. ± 23.3    | 192.4 ± 18.4     | 4.2 | 0.0000001 | 116.4 ± 68.3    | 1.5 | ns      |
| Pyruvate    | 2.36    | 66.3 ± 18.6   | 70.0 ± 12.2      | *   | ns        | 19.9 ± 8.7      | 1.5 | 0.0002  |
| TMAO        | 3.32    | 48.2 ± 4.8    | 35.1 ± 5.6       | 1.2 | 0.0003    | 20.1 ± 11.4     | 1.1 | 0.00003 |
| Tyr         | 3.04    | 54.6 ± 13.5   | 70.4 ± 14.9      | 1.1 | ns        | 34.8 ± 16.1     | *   | 0.03    |
| Val         | 3.60    | 99.8 ± 21.2   | 88.7 ± 14.5      | *   | ns        | 40.2 ± 26.9     | 1.5 | 0.0006  |
| Val         | 1.00    | 84.5 ± 19.3   | 81.4 ± 14.9      | *   | ns        | 46.4 ± 23.7     | 1.2 | 0.007   |

The average integrals of the NMR bin regions ± standard deviations are reported.

δ, NMR chemical shift

VIP, Variable Importance in the Projection

\*, VIP value < 1

P values were obtained by performing t-test between healthy controls and other women's groups. ns = p-value > 0.05

GPC, Glycerophosphocholine

β-HB, β-hydroxybutyrate

PC, Phosphocholine

TMAO, trimethylamine oxide

**Supplementary Figure 2. Follicular Fluids anti-Covid-19 immunoglobulins measurements.** (A) one vaccinated woman; (B) one recovered COVID-19 patient; visible purple bands appear both at the control line (C-line) and the test line 2 (T2) of the cassette; (C) one healthy control woman. In (A) and (C) a visible purple band appears only at the control line (C-line) of the cassette. For all the women IgM test line (T1) was negative.

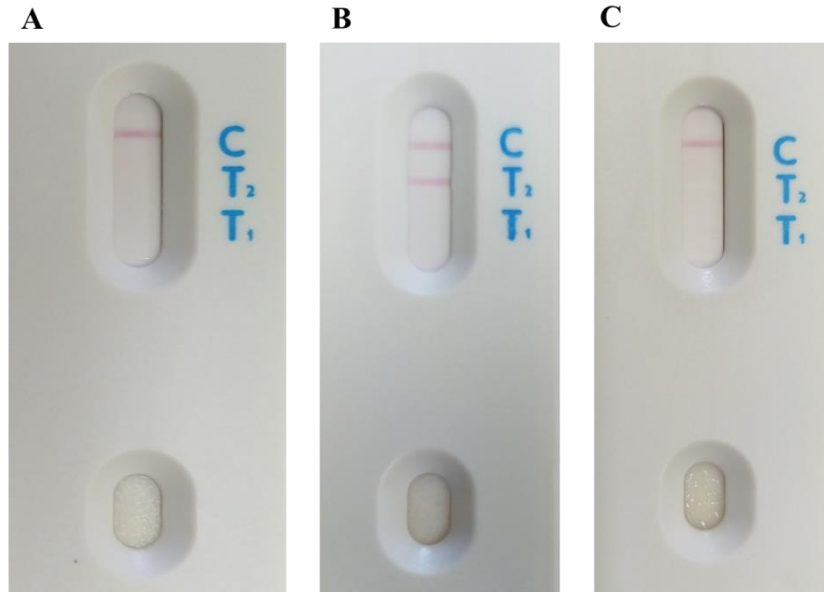

Supplement: Data_Sheet_1.PDF [file Data_Sheet_1.PDF]
